# Supplementary material
Source: PubMed Central journal article supplement (PMC7316367)
Supplement: NIHMS1568957-supplement-1.pdf [file NIHMS1568957-supplement-1.pdf]

**Cell Reports, Volume 30**

## **Supplemental Information**

### **Oct4-Mediated Inhibition of Lsd1 Activity**

#### **Promotes the Active and Primed State**

#### **of Pluripotency Enhancers**

**Lama AlAbdi, Debapriya Saha, Ming He, Mohd Saleem Dar, Sagar M. Utturkar, Putu Ayu Sudyanti, Stephen McCune, Brice H. Spears, James A. Breedlove, Nadia A. Lanman, and Humaira Gowher**

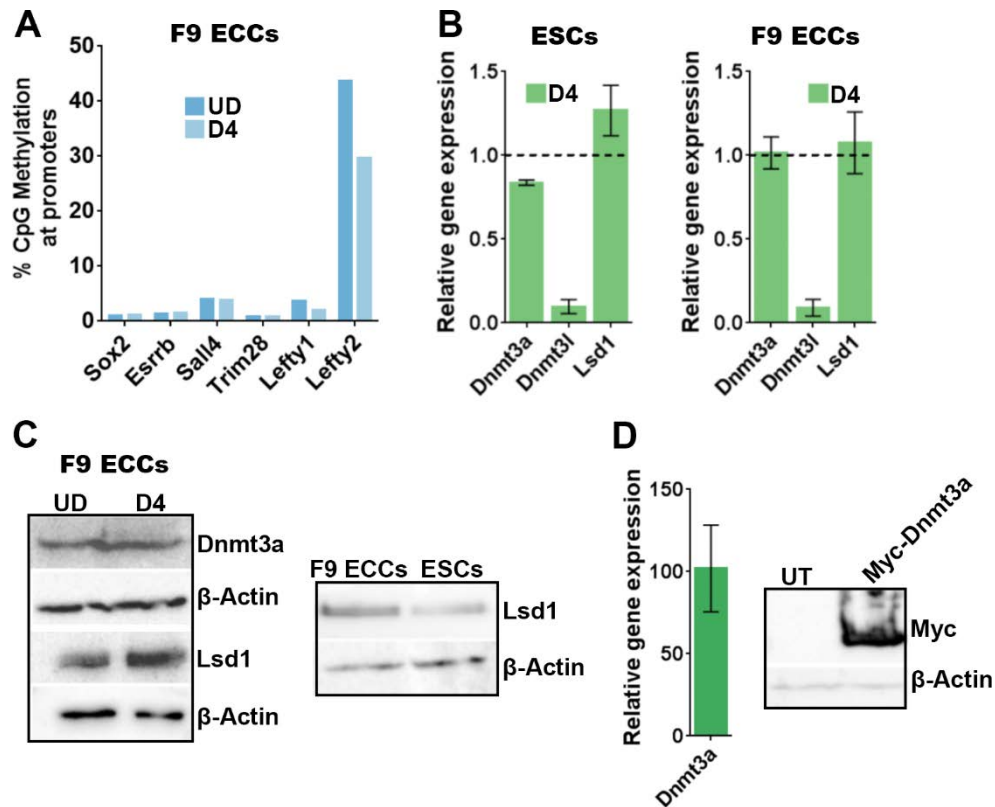

**Figure S1. Expression of epigenetic effectors in embryonal carcinoma cells. (Related to Figure 1)**

UD: undifferentiated, D4: Days post-differentiation. ESCs: embryonic stem cells and F9 ECCs: F9 embryonal carcinoma cells; PpGe: pluripotency gene enhancers.

(A) Bis-Seq analysis of DNA methylation at PpG promoters in F9 ECCs pre- and post-differentiation. DNA methylation at PpG promoters remained under 10% except *Lefty2*, which shows very high methylation in the UD state that is reduced post-differentiation.

(B) RT-qPCR comparing the changes in expression of DNA methyltransferase Dnmt3a and histone demethylase Lsd1 in ESCs with that in F9 ECCs pre- and post-differentiation. The  $C_t$  values are normalized to *Gapdh* and represented relative to expression in undifferentiated cells (dotted line). In both ESCs and ECCs, Lsd1 and Dnmt3a expression is maintained post-differentiation.

(C) Western blot. A total of 50  $\mu\text{g}$  of total protein from undifferentiated and differentiated cells was loaded in each well. Left panel confirms comparable expression of Dnmt3a and Lsd1 pre- and post-differentiation in F9 ECCs. Right panel compares Lsd1 expression in F9 ECCs with ESCs showing very similar levels in these cells.  $\beta$ -Actin is the loading control.

(D) Gene expression analysis by RT-qPCR and Western blot confirming recombinant Myc-Dnmt3a overexpression in F9 ECCs 24 hr post-differentiation (48 hr post-transfection). The data are normalized to a *Gapdh* control and shown relative to untransfected that is set to 1.  $\beta$ -Actin is used as loading control for Western blot.

**A****Distribution of MethyRAD peaks in F9 ECCs**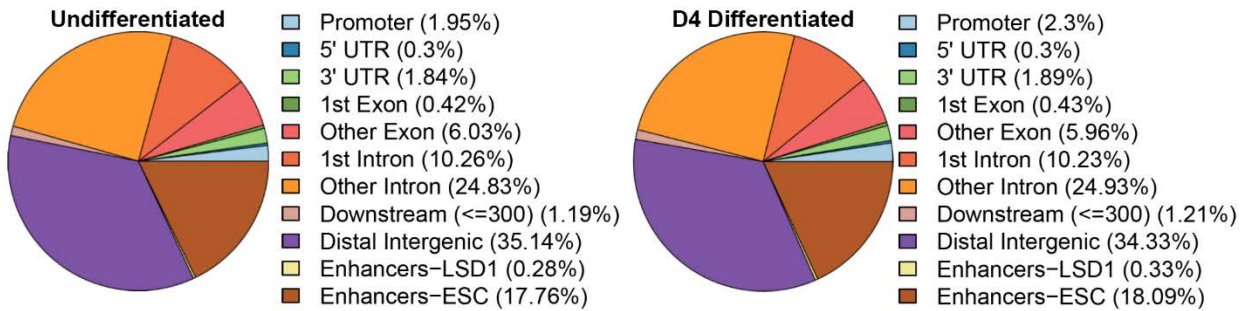**B****Level of DNA methylation at PpG enhancers in F9 ECCs**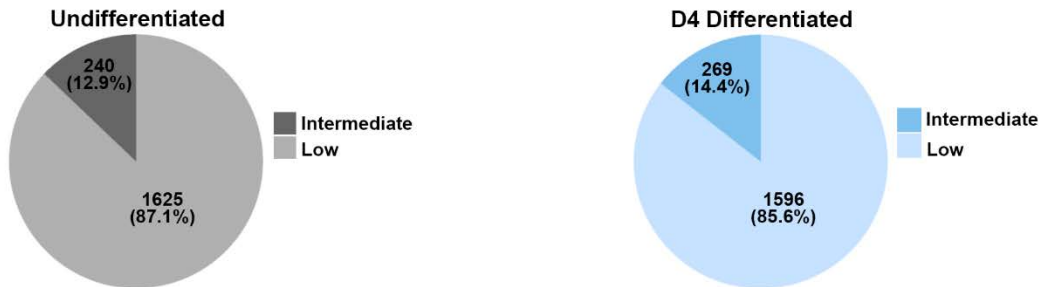**Figure S2. Distribution of MethyRAD peaks. (Related to Figure 2)**

(A) Fractional distribution of MethyRAD peaks in undifferentiated and differentiated F9 ECCs across regulatory regions of the genome.

(B) Pie charts show the level of methylation at PpGe in undifferentiated (grey) and differentiated day 4 (blue) samples. Most PpGe had low levels of methylation or to a lesser extent, intermediate levels of methylation, with none having high CpG methylation.

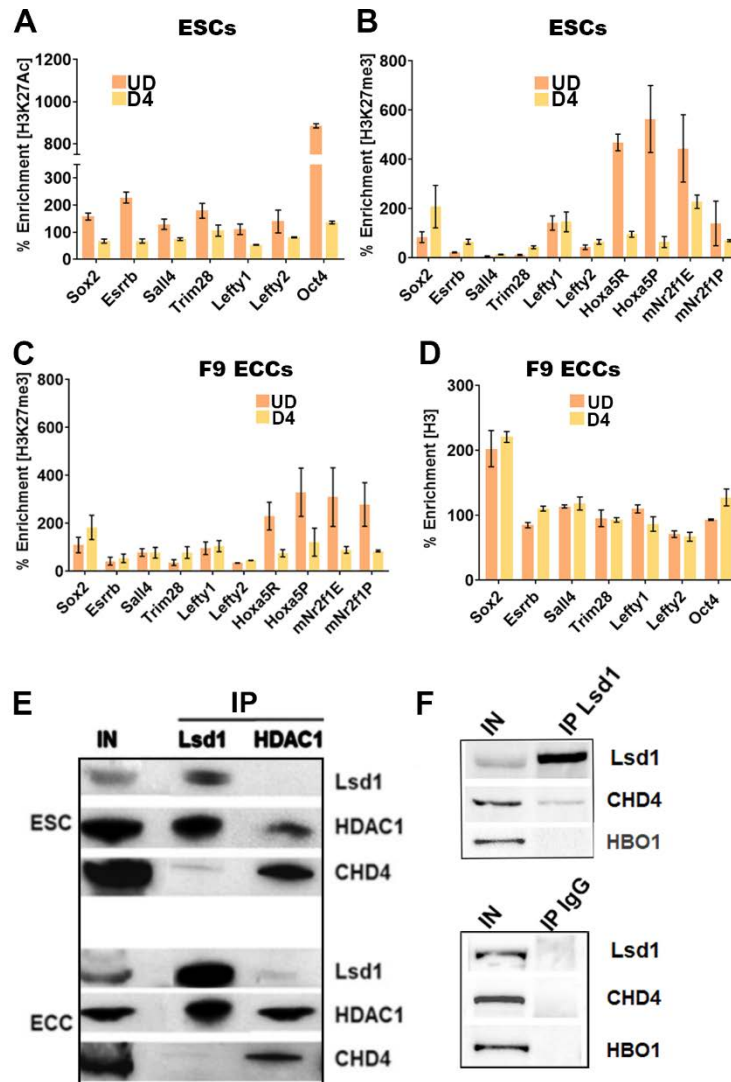

**Figure S3. H3K27 modification of pluripotency gene enhancers in embryonic stem cells and embryonal carcinoma cells. (Related to Figure 3)**

UD: undifferentiated; D4: Days post-induction of differentiation; IP: immunoprecipitation

(A, B, C and D) ChIP-qPCR was used to determine the enrichment of histone modifications at PpGe. (A) H3K27Ac in ESCs (B) H3K27me3 in ESCs (C) H3K27me3 and (D) H3 in F9 ECCs pre- and post-differentiation. Whereas deacetylation of PpGe is observed as a decrease in H3K27Ac signal post-differentiation in ESCs, there is no gain of H3K27me3 at these sites,

neither in ESCs nor in F9 ECCs. As previously reported, we observed a decrease in H3K27me3 at the enhancers and promoters of *Hoxa5* and *mNr2f1* genes, consistent with their transcriptional activation in response to differentiation (Laursen, Mongan et al. 2013). No change was observed in H3 occupancy between UD and D4 at PpGe. % Enrichment = Fold enrichment over input X100

(E, F) Co-IP was performed with anti-Lsd1 or anti-HDAC1 and a control IgG using whole cell extracts from undifferentiated ESCs and F9 ECCs. 20% of the input and eluate from Co-IP were probed for Lsd1-Mi2/NuRD subunits (Lsd1, HDAC1 and CHD4) on Western blot and HBO1 was used as a negative control.

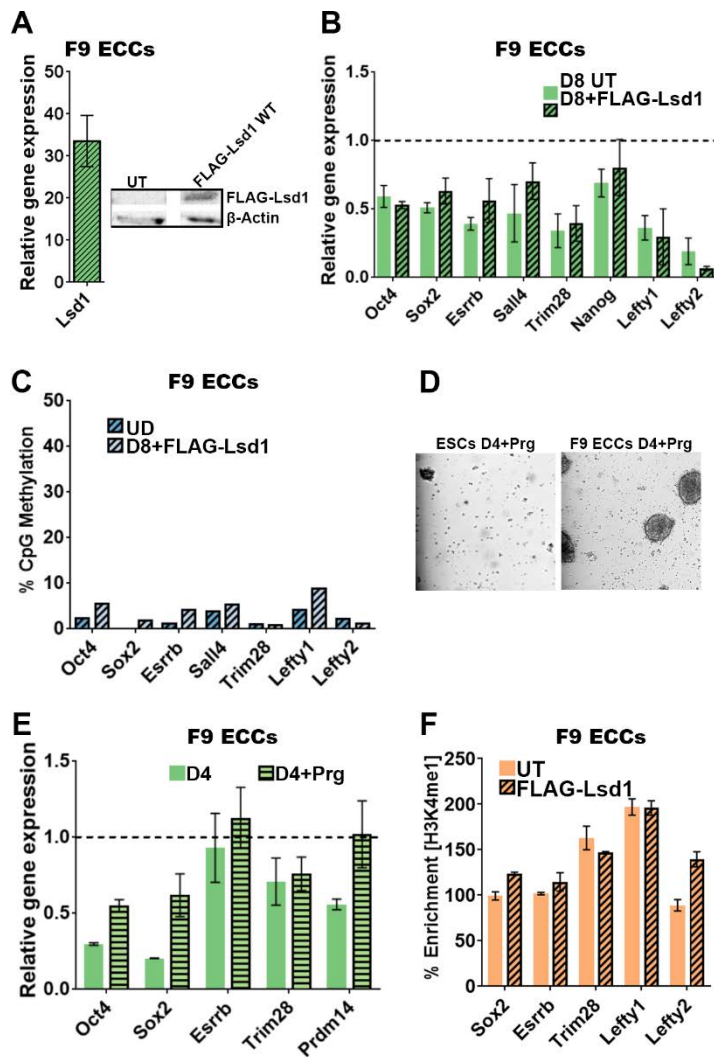

**Figure S4. Effect on Lsd1 on differentiation and pluripotency gene enhancer silencing in embryonal carcinoma cells. (Related to Figure 3)**

UD: undifferentiated; D8: Days post-induction of differentiation; Prg: pargyline.

(A) Gene expression analysis by RT-qPCR and Western blot examining the expression of recombinant FLAG-Lsd1 in F9 ECCs 24 hr post-differentiation (48 hr post-transfection). The  $C_t$  values are normalized to *Gapdh* and represented relative to expression in untransfected cells (set to 1).  $\beta$ -Actin is used as loading control for Western blot.

(B) Gene expression analysis by RT-qPCR of PpGs in F9 ECCs expressing FLAG-Lsd1. Similar to our observation in untransfected WT F9 ECCs, PpGs are partially repressed in these cells, showing no effect of recombinant Lsd1 on PpG repression ( $p$ -value  $>0.1$ ).

(C) Bis-Seq analysis of DNA methylation at PpGe in F9 ECCs expressing recombinant FLAG-Lsd1 showed no gain, corresponding to no loss of H3K4me1 at these sites. Data are an average and SEM of two biological replicates.

(D) Bright field microscopy of ESCs and ECCs differentiated for 4 days in the presence of the Lsd1 inhibitors Prg. 80-90% cell death is observed in ESCs. Lsd1 inhibitor has no effect on F9 ECC differentiation as shown by a normal morphology of embryoid bodies. Scale bar is 100  $\mu$ m.

(E) Gene expression analysis of PpGs by RT-qPCR in differentiating F9 ECCs untreated or treated with Prg. A slight derepression of some PpGs was observed in inhibitor treated cells post-differentiation. Gene expression was normalized to *Gapdh* and represented as relative change to gene expression in undifferentiated (dotted line).

(F) Undifferentiated F9 ECCs were transfected with FLAG-Lsd1 and cultured for 72 hr. H3K4me1 enrichment was determined using ChIP-qPCR. No change in H3K4me1 levels was observed compared to untransfected (UT) cells. % Enrichment = Fold enrichment over input X100



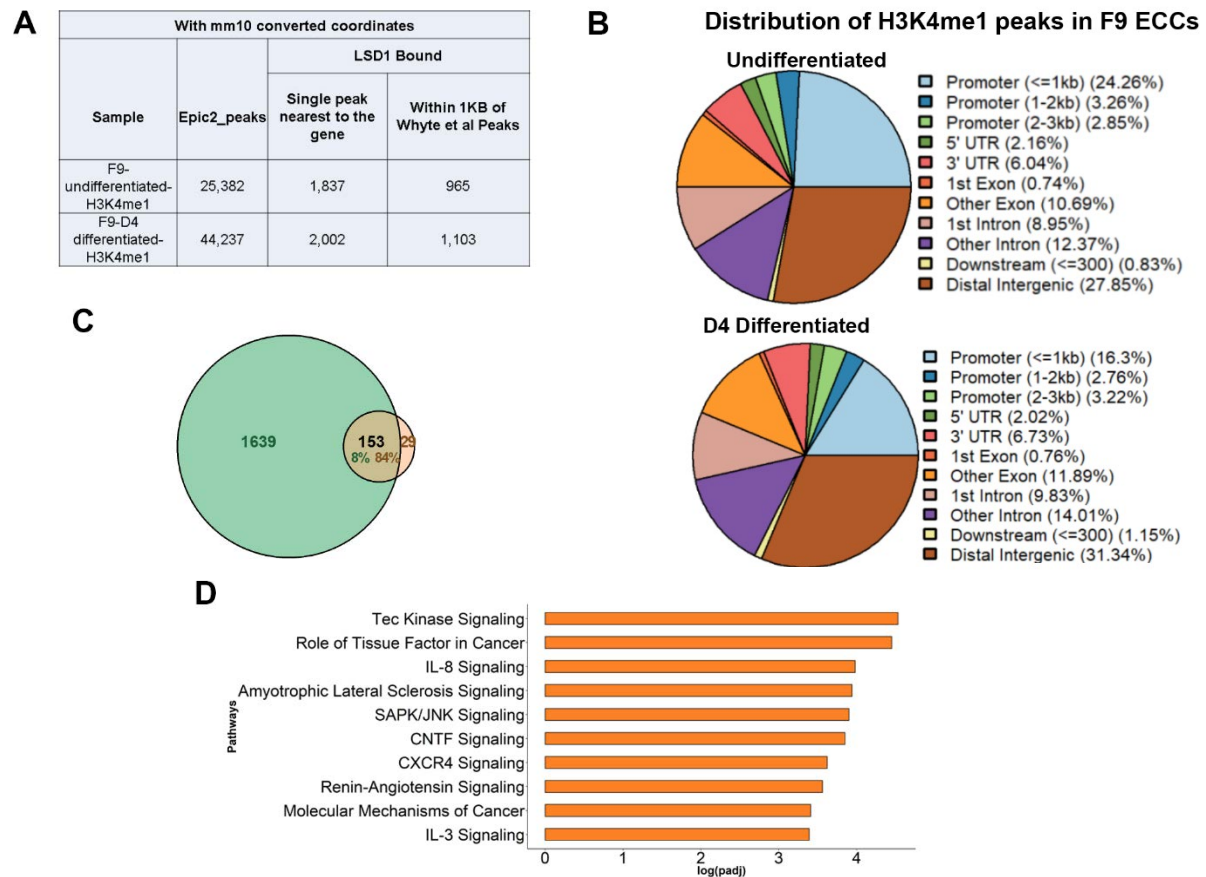

**Figure S5. Distribution of H3K4me1 ChIP-Seq peaks. (Related to Figure 4)**

(A) Summary of the overlapping LSD1 bound sites between H3K4me1 peaks in F9 ECCs and ESCs. To determine correct overlap, peak coordinates from Whyte.et al were converted from mm9 to mm10 using CrossMap tool.

(B) Fractional distribution of H3K4me1 peaks in undifferentiated and differentiated F9 ECCs throughout the genome.

(C) Overlap of the 182 sites that show decrease in H3K4me1 post-differentiation in F9 ECCs with those in ESCs (See Supplementary methods).

(D) Top ten most statistically significant enriched canonical pathways amongst the genes associated with decrease in F9 ECCs.

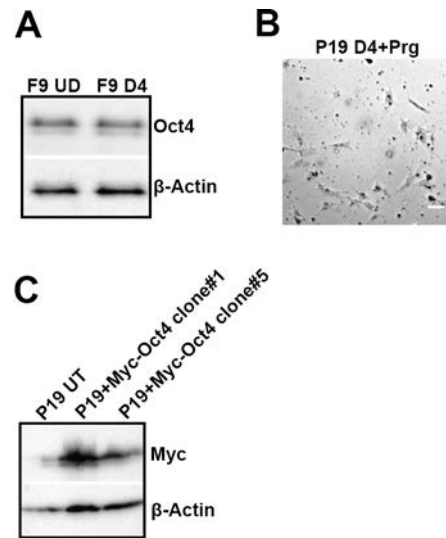

**Figure S6. P19 embryonal carcinoma cells are sensitive to Lsd1 inhibition. Related to Figure 5 and Figure 6**

D4: Days post-induction of differentiation; Prg: pargyline; UT: untransfected control.

(A) Western blot showing protein levels of Oct4 in undifferentiated and D4 differentiated F9 ECCs. A continued expression of Oct4 is seen in differentiated cells although it is lower than that observed in the undifferentiated cells.  $\beta$ -Actin was used as a loading control.

(B) Bright field microscopy of P19 ECCs differentiated for 4 days in presence of Lsd1 inhibitor, Prg. 80-90% cell death is observed in P19 ECCs indicating that Lsd1 activity at PpGe is required for differentiation. Scale bar is 100  $\mu$ m.

(C) Expression analysis by Western blot confirming recombinant Myc-Oct4 overexpression in two independent clones of P19 ECCs.  $\beta$ -Actin was used as a loading control for Western blot.

## Supplementary Tables

| <b>Genomic element</b>  | <b>No. of CpGs</b> |    |
|-------------------------|--------------------|----|
| <b>Enhancer</b>         | Lefty1             | 4  |
|                         | Lefty2             | 6  |
|                         | Sall4              | 4  |
|                         | Sox2               | 10 |
|                         | Trim28             | 6  |
|                         | Esrrb              | 6  |
|                         | Oct4               | 4  |
| <b>Promoter</b>         | Lefty1             | 6  |
|                         | Lefty2             | 9  |
|                         | Sall4              | 10 |
|                         | Sox2               | 18 |
|                         | Trim28             | 19 |
|                         | Esrrb              | 29 |
| <b>Imprinted region</b> | H19                | 11 |

**Table S1. Number of CpGs at each site used for Bis-Seq DNA methylation analysis. Related to DNA methylation analysis in Method Details**

The number of CpG sites used to compute percent methylation within the H19 imprinted region, PpG enhancers, and promoters.

| <i>Sample</i>                | <i>Lefty1</i> | <i>Lefty2</i> | <i>Sall4</i>  | <i>Sox2</i>   | <i>Trim28</i> | <i>Esrrb</i>  | <i>Oct4</i>  | <b><i>Total</i></b> |
|------------------------------|---------------|---------------|---------------|---------------|---------------|---------------|--------------|---------------------|
| <i>ESCs UD</i>               | 28465         | 21981         | 2861          | 5826          | 17973         | 6034          | 1902         | <b>85042</b>        |
| <i>ESCs D4</i>               | 401           | 275           | 216           | 881           | 269           | 5381          | 6322         | <b>13745</b>        |
| <i>F9 ECCs UD</i>            | 57536         | 49939         | 27259         | 40357         | 14261         | 22395         | 6322         | <b>232670</b>       |
| <i>F9 ECCs D4</i>            | 62876         | 38534         | 29204         | 32570         | 13304         | 21569         | 8865         | <b>214866</b>       |
| <i>F9 ECCs D6</i>            | 62185         | 38590         | 30187         | 28239         | 10163         | 13059         | 6980         | <b>182422</b>       |
| <i>F9 ECCs+Myc-Dnmt3a UD</i> | 3733          | 2692          | 1308          | 2612          | 1249          | 24671         | 311          | <b>38969</b>        |
| <i>F9 ECCs+Myc-Dnmt3a D8</i> | 2734          | 1637          | 1135          | 2665          | 1097          | 4316          | 350          | <b>24705</b>        |
| <i>F9 ECCs+FLAG-Lsd1 UD</i>  | 2513          | 2267          | 816           | 4204          | 820           | 24412         | 1791         | <b>43102</b>        |
| <i>F9 ECCs+FLAG-Lsd1 D8</i>  | 2819          | 1950          | 1946          | 4530          | 1169          | 21576         | 1601         | <b>42022</b>        |
| <i>P19 ECCs UD</i>           | 26651         | 18427         | 10541         | 31377         | 9437          | 46154         | 7044         | <b>175098</b>       |
| <i>P19 ECCs D4</i>           | 40376         | 30470         | 18198         | 27196         | 11267         | 56736         | 14506        | <b>241010</b>       |
| <i>P19 ECCs D8</i>           | 4713          | 8696          | 5880          | 28944         | 6475          | 24128         | 4498         | <b>96640</b>        |
| <i>P19 ECCs+Myc-Oct4 UD</i>  | 23029         | 11988         | 11538         | 9324          | 7735          | 28746         | 7510         | <b>130029</b>       |
| <i>P19 ECCs+Myc-Oct4 D4</i>  | 35014         | 20519         | 14300         | 18022         | 13227         | 43559         | 14989        | <b>210333</b>       |
| <b><i>Total</i></b>          | <b>353045</b> | <b>247965</b> | <b>156838</b> | <b>236746</b> | <b>108446</b> | <b>342735</b> | <b>76669</b> | <b>1522445</b>      |

**Table S2. Number of reads for each enhancer used for Bis-Seq analysis. Related to DNA methylation analysis in Method Details**

The total number of reads from Wide-Seq runs that were used for data presented in this study.

The number of reads were calculated for each sample and enhancer, along with the overall total number of reads.

| <i>Sample</i>       | <i>Lefty1</i> | <i>Lefty2</i> | <i>Sall4</i> | <i>Sox2</i>  | <i>Trim28</i> | <i>Esrrb</i> | <i>H19</i>   | <b><i>Total</i></b> |
|---------------------|---------------|---------------|--------------|--------------|---------------|--------------|--------------|---------------------|
| <i>F9 ECCs UD</i>   | 51            | 726           | 486          | 9556         | 7575          | 4191         | 11062        | <b>33647</b>        |
| <i>F9 ECCs D4</i>   | 99            | 1590          | 1400         | 17431        | 16307         | 13865        | 9376         | <b>60068</b>        |
| <b><i>Total</i></b> | <b>150</b>    | <b>2316</b>   | <b>1886</b>  | <b>26987</b> | <b>23882</b>  | <b>18056</b> | <b>20438</b> | <b>93715</b>        |

**Table S3. Number of reads for promoters and imprinted regions used for Bis-Seq analysis. Related to DNA methylation analysis in Method Details**

The total number of reads from Wide-Seq runs that were used in this study. The number of reads were calculated for each sample, promoter site, and imprinted locus, as well as the overall total number of reads.
